# Supplementary material
Source: PubMed Central journal article supplement (PMC3492729)

## **A Role for CTCF and Cohesin in Subtelomere Chromatin Organization, TERRA Transcription, and Telomere End Protection**

### **Supplementary Materials**

#### **Supplementary Figure Legends**

**Figure S1. Summary of ChIP-Seq analysis of CTCF, cohesin, and RNAPII binding to type I human subtelomeres.** Fragment density profiles were generated for samples and matched IgG controls as described in Methods. The fold enrichment of sample over IgG is shown. The Y axis for each track is auto-scaled to highest peak in each chromosome region shown. Subtelomere identity is indicated in the top left of each panel. (A-D) CTCF\_W and SMC1\_W were newly generated ChIP-Seq data using human pleural effusion lymphoma cell line BCBL1. CTCF, RNAPII, and Rad21 were derived from human encode data sets using B-lymphoblastoid cell lines. (E) Example enrichment profiles for ChIP-Seq analysis, comparing the standard multi-mapping method used vs allowing only unique mappings. The top track of each dataset pair permitted multi-mapping in the indicated ChIP and control IgG dataset, and the bottom (designated by \_U) permitted only unique mappings in both ChIP and IgG control dataset. Binding in the first 15 kb subtelomeres of chromosome arms 10q, 13q, 15q, and XYq are shown.

**Figure S2. Summary of ChIP-Seq analysis on type II human subtelomeres.** Same as in Figure S1, except for subtelomeres that lack an obvious CTCF binding peak proximal to the terminal repeat tracts.

**Figure S3. Validation of CTCF binding site at 10q human subtelomeres in BCBL1**

**cells.** (A) Schematic of the 10q subtelomere showing the relative positions of the 29 bp repeat element, CpG island, and TTAGGG terminal repeats. (B) ChIP-qPCR for TRF1, TRF2, CTCF, RNAPII, Rad21, and SMC1 relative to IgG controls using primers for the 10q subtelomere at positions close (~400 bp) to TTAGGG repeat (black), at CpG island (red), or ~2 kb from terminal repeats (green). Bar graph represents the average value of percentage of input for each ChIP from three independent PCR (Mean  $\pm$  SD).

**Figure S4. Chromatin organization of 10q subtelomeres.** (A-B) Conventional ChIP-qPCR was used to assay CTCF, Rad21, SMC3, TRF1, TRF2, histone H3K4me2 and me3, H3K9me2 and me3, and RNAPII binding at various nucleotide positions relative to the TTAGGG repeat tract (position 0) in the 10q subtelomere or control *Gapdh* region for either U2OS (A) or HCT116 (B) cell lines. Bar graph represents the average value of percentage of input for each ChIP from three independent ChIP experiments (Mean  $\pm$  SD).

**Figure S5. Additional examples for chromatin organization of type I subtelomeres.**

(A) Conventional ChIP-qPCR was used to assay CTCF, Rad21, SCM3, TRF1, TRF2, histone H3K4me2 and me3, H3K9me2 and me3, RNAPII, and control IgG binding at various nucleotide positions relative to the TTAGGG repeat tract (position 0) in the 13q subtelomere for U2OS cell line. Bar graph represents the average value of percentage of input for each ChIP from three independent ChIP experiments (Mean  $\pm$  SD). (B) Same as in the panel A, except that 15q subtelomere was analyzed by ChIP-qPCR.

**Figure S6. CTCF depletion reduces TERRA levels in HCT116 cells.** (A) Northern blot analysis of TERRA in HCT116 cells transfected with siControl, siCTCF-1, or siCTCF-2 with control 18S (middle panel). EtBr staining of the gel (lower panel) indicates RNA integrity (28S and 18S bands). About 10  $\mu\text{g}$  of total RNA isolated from transfected cells at 4 days post-transfection was loaded in each lane. Numbers at the bottom show the average value of TERRA signals relative to 18S RNA signals in siCTCF versus siControl from three independent experiments. (B) Western blot of HCT116 cells transfected with siRNA control, siCTCF-1, or siCTCF-2 and assayed with anti-CTCF or anti-Actin. (C) qRT-PCR of TERRA from individual telomeres in HCT cells transfected with siControl, siCTCF-1, or siCTCF-2 at 4 days post-transfection. Relative RT-PCR represents the value calculated by  $\Delta\Delta\text{CT}$  methods relative to siControl and *Gapdh*. Bar graph represents the average value from three independent PCR reactions (Mean  $\pm$  SD).

**Figure S7. TERRA transcribed from type II subtelomeres are less responsive to CTCF depletion.** (A) Additional examples of Northern blot analysis of TERRA used for quantification in Fig. 4F. EtBr staining of the gel (lower panel) indicates RNA integrity (28S and 18S bands). Equal amount of total RNA ( $\sim 7.5 \mu\text{g}$ ) isolated from cells at 4 days post-transfection was loaded in each lane. (B) qRT-PCR of TERRA from type I telomeres at 10q, XYq, 2q, and 17p in U2OS cells treated with siControl, siCTCF-1, and siCTCF-2. qRT-PCR of CTCF was used as control for CTCF depletion by CTCF siRNAs. Relative RT-PCR represents the value calculated by  $\Delta\Delta\text{CT}$  methods relative to siControl and *Gapdh*. Bar graph represents the average value from three independent

Deng et al.

CTCF depletion experiments (Mean  $\pm$  SD). (C) The same as in B, except that TERRA derived from type II telomeres at 3p, 7p, XYp, and 12q was assayed by qRT-PCR.

**Figure S8. Effect of shRNA depletion of Rad21 and CTCF on TERRA expression.**

(A) Western blot of U2OS cells transduced with shControl, shCTCF, or shRad21, and assayed for expression levels of CTCF, Rad21, SMC3, TRF1, and Actin at 6 days post lentiviral infection. (B) Additional examples of Northern blot analysis of TERRA used for quantification in Fig. 5C. EtBr staining of the gel (lower panel) indicates RNA integrity (28S and 18S bands).

**Figure S9. shRNA depletion of Rad21 and CTCF reduces TERRA expression in**

**HCT116 cells.** (A) Western blot of HCT cells transduced with shControl, shCTCF, or shRad21, and assayed for expression levels of CTCF, Rad21, TRF1, and Actin at 6 days post-lentiviral infection. (B) qRT-PCR of TERRA from individual telomeres at 10q, XYq, 13q, 15q, 16p, and 7p together with CTCF and Rad21 expression in infected cells as above. Relative RT-PCR represents the value calculated by  $\Delta\Delta$ CT methods relative to shControl and *Gapdh*. Bar graph represents the average value from three independent PCR reactions (Mean  $\pm$  SD).

**Figure S10. CTCF and Rad21 depletion leads to a loss of RNAPII and TRF binding at 10q subtelomeres.**

(A) ChIP-qPCR for CTCF, Rad21, and SMC3 were shown at various positions of the 10q subtelomere relative to the TTAGGG repeat tracts (position 0). U2OS cells were transduced with shControl (black), shCTCF (red), or shRad21

Deng et al.

(green) and assayed by ChIP at day 6 post-infection. ChIP-qPCR at *Gapdh* region was included as a control for specificity. Bar graph represents the average value of % input for each ChIP from three independent experiments (Mean  $\pm$  SD). (B-D) Same as in A, except that TRF1, TRF2, or control IgG (B), RNAPII or RNAPII S2 (C), or histone H3 K4 or K9 tri-methylation (D) were assayed by ChIP-qPCR in infected U2OS cells.

**Figure S11. Effect of multiple CTCF shRNAs on TRF binding at 10q subtelomeres.**

(A) Western blot of U2OS cells transduced with lentiviruses for CTCF or control, and assayed for expression levels of CTCF and Actin at 6 days post-lentiviral infection. (B-F) ChIP-qPCR for IgG (B), CTCF (C), SMC3 (D), TRF1 (E), and TRF2 (F) were shown at various positions of the 10q subtelomere relative to the TTAGGG repeat tracts (position 0). U2OS cells were transduced with shControl (black), shCTCF-2, or shCTCF-5 and assayed by ChIP at day 6 post-infection. Bar graph represents the average value of % input for each ChIP from three qPCR reactions (Mean  $\pm$  SD).

**Figure S12. MNase I digestion of chromatin at telomeres and subtelomeres after CTCF and Rad21 depletion.**

(A) Micrococcal nuclease (MNase) pattern assay was performed in U2OS cells transfected with siControl, siCTCF-1, or siCTCF-2 for 4 days. Nuclei was treated with indicated units of MNase, fractionated on 1.2% agarose gel, and assayed by hybridization with either <sup>32</sup>P-labeled (TAACCC)<sub>4</sub> probe (left panel) or <sup>32</sup>P-labeled Alu probe (right panel). (B) MNase pattern assay was performed in U2OS cells transduced with shControl, shCTCF-5, or shRad21 for 6 days. Nuclei was treated with indicated units of MNase, and assayed by hybridization with either <sup>32</sup>P-labeled XYq probe (left panel) or <sup>32</sup>P-labeled (TAACCC)<sub>4</sub> probe (right panel).

**Figure S13. CTCF depletion by siRNA leads to an increase in telomere associated DNA damage foci (TIFs).** (A) U2OS cells were transfected with siControl, siCTCF-1, or siCTCF-2 for 4 days and assayed by immunofluorescence (IF) with antibody to TRF2 (red) and antibody to 53BP1 (green). Dapi (blue) and merge image is shown to the right. (B) Quantification of the percentage of cells with more than five TIFs as represented in panel A. The bar graph is the mean and SDs derived from quantification of more than 100 nuclei from three independent TIF assays. p value was calculated by two-tailed Student's t –Test. (C) IF with anti-TRF2 (red) or  $\gamma$ H2AX (green) in U2OS cells transfected with siControl, siCTCF-1, or siCTCF-2 for 4 days. Dapi (blue) and merge image is shown to the right. (D) Quantification of telomere associated DNA damage foci as represented in panel C. The bar graph is the mean and SDs derived from quantification of more than 100 nuclei from three independent TIF assays. p value was calculated by two-tailed Student's t –Test.

**Figure S14. Telomere repeat length does not change in CTCF and Rad21 depleted cells.** (A) Telomere repeat length was measured by restriction digest with *AluI/MboI* and Southern hybridization with TTAGGG-specific probe in U2OS and HCT166 cells transfected with siCon or siCTCF-specific siRNA at 4 days post-transfection. The same blot was stripped, and hybridized with Alu-specific probe shown in right panel. (B) Telomere repeat length of HCT116 cells infected with shControl, shCTCF-5, or shRad21 was assayed at 6 or 10 days post-infection by Southern blotting using  $^{32}\text{P}$ -(TAACCC)<sub>4</sub> probe. Ethidium bromide staining of total DNA digest was used as a control for DNA

Deng et al.

loading (left panel). (C) Telomere repeat length of U2OS cells infected with shControl, shCTCF-5, or shRad21 at 4, 6 or 10 days post-infection. Genomic DNA was digested with *AluI/MboI*, fractionated by pulsed-field gel electrophoresis, and hybridized with <sup>32</sup>P-(TAACCC)<sub>4</sub> probe for telomere repeats (right panel). Ethidium bromide staining of total DNA digest was used as a control for DNA loading (left panel). Numbers on the left show the position of DNA markers in Kb.

**Figure S15. Melting curve control for primers used in ChIP-qPCR.** (A-D) Example snapshots of dissociation curves of ChIP-qPCR primers for XYq (A), 10q (B), 13q (C), 15q (D) subtelomeres. All of these primers show single amplicon peak.

**Figure S16. Melting curve control for primers used in qRT-PCR analysis of TERRA RNA.** (A) Example snapshots of dissociation curves of qRT-PCR primers for TERRA RNA derived from type I subtelomeres. (B) Example snapshots of dissociation curves of qRT-PCR primers for TERRA RNA derived from type II subtelomeres.

**Supplementary File 1. DNA sequences of human subtelomere assemblies (1-15K) in concatenated FASTA format.**

**Supplementary File 2. Comparison of ChIP-Seq reads by unique mapping and multi mapping.** (A) ChIP-Seq dataset characteristics. Read mapping statistics for each dataset used, both genome-wide and just for the 15 K subtelomere assemblies. (B) 15K Subtel Mappings. Read mapping statistics broken down by each 15K Subtel Region for

Deng et al.

the CTCF (public), CTCF\_W (Wistar), RNAPII (public), SMC1\_W (Wistar), and Rad21 (public) datasets and their respective controls. (C) Distal peak region mappings. Read mapping statistics broken down by the distal peak-containing segments of each subtel region for the CTCF (public), CTCF\_W (Wistar), RNAPII (public), SMC1\_W (Wistar), and Rad21 (public) datasets and their respective controls. (D) 29-mer VNTR multi mappings. Read mapping statistics for the 29-mer VNTR segments of 10q, XYq, 13q, and 15q.



**Supplementary Table S1. List of primers used for quantitative RT-PCR, and copy number/known loci amplified by subterminal TERRA primer sets.** Subterminal Sequence Families are as defined previously (Riethman, 2008), and the number of distinct genomic loci matching the primer set computationally is given in parentheses. The genomic locations of each of these loci are indicated; “Tel” indicates immediately adjacent to the telomere repeat tract in the sequence organization shown in Figures 1 and 2. “Trunc” indicates that while the assay is derived from the indicated telomere-adjacent sequence from a specific allele, other alleles and subtelomeric locations of the amplicon are within duplicated subtelomeric DNA but not immediately adjacent to the terminal (TTAGGG)<sub>n</sub> tracts (“Subtel”). The number of non-subtelomeric duplicated sites, where they exist for an assay, are as indicated.

| Transcript | Primer   | Sequence (5' -3')      | Subterm Family<br>(Number of<br>Copies with<br>amplicon<br>match) | Known Loci                                         | Other<br>Comments |
|------------|----------|------------------------|-------------------------------------------------------------------|----------------------------------------------------|-------------------|
| CTCF       | 5'primer | GACCCACCCCTTCTTCAGATG  | na                                                                | na                                                 |                   |
| CTCF       | 3'primer | CCACAGCAGCCTCTGCTTCT   | na                                                                | na                                                 |                   |
| Rad21      | 5'primer | GGCCAGCAGAACAACATAGATG | na                                                                | na                                                 |                   |
| Rad21      | 3'primer | TTTGTCAGCTTTTCGCTTAACT | na                                                                | na                                                 |                   |
| 10q-TERRA  | 5'primer | GCCTTGCCTTGGGAGAATCT   | D (10)                                                            | 1q,2q,4q,5q,6q,<br>10q,13q, 16q,<br>21q,22q (Tel)  |                   |
| 10q-TERRA  | 3'primer | AAAGCGGGAAACGAAAAGC    |                                                                   |                                                    |                   |
| XYq-TERRA  | 5'primer | CCCCTTGCCTTGGGAGAA     | C (3)                                                             | 9p, 19p, XYq<br>(Tel)                              |                   |
| XYq-TERRA  | 3'primer | GAAAGCAAAAGCCCCTCTGA   |                                                                   |                                                    |                   |
| 2q-TERRA   | 5'primer | GCCTTGCCTTGGGAGAATCT   | D (10)                                                            | 1q,2q,4q,5q,6q,<br>10q, 13q, 16q,<br>21q,22q (Tel) |                   |
| 2q-TERRA   | 3'primer | AAAGCGGGAAACGAAAAGC    |                                                                   |                                                    |                   |
| 13q-TERRA  | 5'primer | GCACTTGAACCCTGCAATACAG | D (10)                                                            | 1q,2q,4q,5q,6q,<br>10q,13q, 16q,<br>21q,22q (Tel)  |                   |
| 13q-TERRA  | 3'primer | CCTGCGCACCGAGATTCT     |                                                                   |                                                    |                   |

|           |           |                                 |            |                                                                      |  |
|-----------|-----------|---------------------------------|------------|----------------------------------------------------------------------|--|
| 15q-TERRA | 5' primer | TGCAACCGGGAAAGATTTTATT          | C (2)      | 15q, 19p (Tel)                                                       |  |
| 15q-TERRA | 3' primer | GCGTGGCTTTGGGACAAC              |            |                                                                      |  |
| 16p-TERRA | 5' primer | TGCAACCGGGAAAGATTTTATT          | C (3)      | 9p, 16p, 19p (Tel)                                                   |  |
| 16p-TERRA | 3' primer | GCCTGGCTTTGGGACAAC              |            |                                                                      |  |
| 7p-TERRA  | 5' primer | GGAGGCTGAGGCAGGAGAA             | Trunc (13) | 7p (Tel); 1p, 3q, 9q, 11p, 16q, 19p (Subtel); + 6 internal dup sites |  |
| 7p-TERRA  | 3' primer | CAATCTCGGCTCACCACAATC           |            |                                                                      |  |
| 3p-TERRA  | 5' primer | ACGACGTCTACTTTGTTCTTGGT         | 1          | 3p (Tel)                                                             |  |
| 3p-TERRA  | 3' primer | AAGAGCACACGGCCAGACA             |            |                                                                      |  |
| XYp-TERRA | 5' primer | CCACAACCCCACCAGAAAGA            | 1          | XYp                                                                  |  |
| XYp-TERRA | 3' primer | GCGCGTCCGGAGTTTG                |            |                                                                      |  |
| 12q-TERRA | 5' primer | ATTTCCCGTTTTCCACTGA             | 2          | 7q, 12q (Tel)                                                        |  |
| 12q-TERRA | 3' primer | CTGTTTGCAGCGCTGAATATTC          |            |                                                                      |  |
| 17p-TERRA | 5' primer | GGGACAGAAGTGGATAAGCTGATC        | Trunc (7)  | 17p (Tel); 1p, 3q, 7p, 9q, 11p, 16q (Subtel)                         |  |
| 17p-TERRA | 3' primer | GATCCCACTGTTTTTATTACTGTTCC<br>T |            |                                                                      |  |
| 17q-TERRA | 5' primer | AGCTACCTCTCTCAACACCAAGAAG       | B, D (13)  | 2q, 4q, 5q, 6p, 6q, 8p, 10q, 16q, 17q, 19p, 19q, 21q, 22q (Tel)      |  |
| 17q-TERRA | 3' primer | GTCCATGCATTCTCCATTGATAAG        |            |                                                                      |  |
| Gapdh     | 5' primer | AGCCACATCGCTCAGACAC             | na         | na                                                                   |  |
| Gapdh     | 3' primer | GCCCAATACGACCAAATCC             |            |                                                                      |  |

**Supplementary Table S2. List of primers used for ChIP, and copy number/ known loci amplified by ChIP primer sets.** Subterminal Sequence Families are as defined previously (Riethman, 2008), and the number of distinct genomic loci matching the primer set computationally is given in parentheses. The genomic locations of each of these loci are indicated; “Tel” indicates immediately adjacent to the telomere repeat tract in the sequence organization shown in Figures 1 and 2. “2qfus” refers to the evolutionarily recent fusion junction of primate telomeres to form modern human chromosome 2; this locus retains similarity to subterminal family C on one side of the fusion junction, and family D on the other side. No non-telomeric sites except for the 2qfus site (where indicated) are amplified by the ChIP-seq primers used.

| Region       | Primer   | Sequence (5' -3')             | Subterm Family<br>(Number of Copies<br>with amplicon<br>match) | Known Loci                                            | Other<br>Comments |
|--------------|----------|-------------------------------|----------------------------------------------------------------|-------------------------------------------------------|-------------------|
| XYq-1/ -109  | 5'primer | CCCCTTGCCTTGGGAGAA            | C (3)                                                          | 9p, 19p, XYq (Tel)                                    |                   |
| XYq-1/ -109  | 3'primer | GAAAGCAAAAGCCCCTCTGA          |                                                                |                                                       |                   |
| XYq-3/ -2733 | 5'primer | CCAAGGCCTGGCAGAGTCT           | C (7)                                                          | 9p,12p,15q,16p,19p,<br>XYq (Tel); 2qfus<br>(internal) |                   |
| XYq-3/ -2733 | 3'primer | TGCGGACTGTTTGCTGCTT           |                                                                |                                                       |                   |
| XYq-2/-966   | 5'primer | GGTGGAACCTCAGTAATCCGAA<br>A   | C (5)                                                          | 9p,15q,16p,19p,XYq<br>(Tel)                           |                   |
| XYq-2/-966   | 3'primer | AGCAAGCGGGTCCTGTAGTG          |                                                                |                                                       |                   |
| XYq-1299     | 5'primer | ATTATAGGGAAACACCAGGAG<br>CAT  | C (6)                                                          | 9p,15q,16p,19p,XYq<br>(Tel); 2qfus (internal)         |                   |
| XYq-1299     | 3'primer | TACTTTTAAACCCAGGAATCCC<br>ATA |                                                                |                                                       |                   |
| XYq-1456     | 5'primer | GTGCCTGTTTCTCCACAAAGTG<br>T   | C (7)                                                          | 9p,12p,15q,16p,19p,<br>XYq (Tel); 2qfus<br>(internal) |                   |

|                      |          |                                 |           |                                                                                     |                                |
|----------------------|----------|---------------------------------|-----------|-------------------------------------------------------------------------------------|--------------------------------|
| XYq-1456             | 3'primer | ATCTCCAGGGCTTCACCTGTT           |           |                                                                                     |                                |
| XYq-1742             | 5'primer | TCTGTTTCATGTGTATTTGCTGTC<br>TCT | C (7)     | 9p,12p,15q,16p,19p,<br>XYq (Tel); 2qfus<br>(internal)                               |                                |
| XYq-1742             | 3'primer | AAAGGCCTGGTGGAAAGGA             |           |                                                                                     |                                |
| 13q-152              | 5'primer | GCACTTGAACCCTGCAATACAG          | D (10)    | 1q, 2q, 4q, 5q, 6q,<br>10q, 13q, 16q, 21q,<br>22q (Tel)                             |                                |
| 13q-152              | 3'primer | CCTGCGCACCGAGATTCT              |           |                                                                                     |                                |
| 13q-957<br>CTCF site | 5'primer | AGTGGAACCTGAGTATTCTGAA<br>AAGC  | D (11)    | 1q, 2q, 4q, 5q, 6q,<br>10q, 13q, 16q, 19q,<br>21q, (Tel); 2qfus<br>(internal)       |                                |
| 13q-957<br>CTCF site | 3'primer | GCAGTTGTCTACTCGCCAGTA           |           |                                                                                     |                                |
| 13q-6545             | 5'primer | TCCCTCCCACGACATTTAGG            | B, D (14) | 1q,2q,4q,5q,6q,10q,<br>13q,16q, 17q, 19p,<br>19q,21q,22q (Tel);<br>2qfus (internal) | RPL23a<br>pseudogene<br>copies |
| 13q-6545             | 3'primer | CCTGTTTCCCCACCCAGAT             |           |                                                                                     |                                |
| 15q-265              | 5'primer | TGCAACCGGGAAAGATTTTATT          | C (2)     | 15q, 19p (Tel)                                                                      |                                |
| 15q-265              | 3'primer | GCGTGGCTTTGGGACAACCT            |           |                                                                                     |                                |
| 15q-941<br>CTCF site | 5'primer | TGCACGCGCAGAAACTCA              | C (3)     | 15q, 16p, 19p (Tel)                                                                 |                                |
| 15q-941<br>CTCF site | 3'primer | CCGGCTTTTCGGATTACTGA            |           |                                                                                     |                                |
| 15q-6700             | 5'primer | CAGAACCCAGCTCACCTACCTT          | C (7)     | 9p,12p,15q,16p,19p,<br>XYq (tel); 2qfus<br>(internal)                               | WASH<br>gene copies            |
| 15q-6700             | 3'primer | AACTGCCACCTTCCACACT             |           |                                                                                     |                                |
| 10q-1/-396           | 5'primer | GCCTTGCCTTGGGAGAATCT            | D (10)    | 1q, 2q, 4q, 5q, 6q,<br>10q, 13q, 16q, 21q,<br>22q (Tel)                             |                                |
| 10q-1/-396           | 3'primer | AAAGCGGGAAACGAAAAGC             |           |                                                                                     |                                |
| 10q-2/-1122          | 5'primer | CAGAGACGAGTGGAAACCTGAG<br>TAAT  | B, D (14) | 1q,2q,4q,5q,6q,8p,<br>10q,13q,16q,19p,19q,<br>21q,22q (Tel); 2qfus<br>(internal)    |                                |

|             |          |                               |           |                                                                                  |  |
|-------------|----------|-------------------------------|-----------|----------------------------------------------------------------------------------|--|
| 10q-2/-1122 | 3'primer | TGGGCAAGCTGGTCCTGTAG          |           |                                                                                  |  |
| 10q-1539    | 5'primer | CGCCTCCTGCACCACTTAAA          | B, D (14) | 1q,2q,4q,5q,6q,8p,<br>10q,13q,16q,19p,19q,<br>21q,22q (Tel); 2qfus<br>(internal) |  |
| 10q-1539    | 3'primer | CGCAGTAATAGCTCCTTTTCAG<br>TTT |           |                                                                                  |  |
| 10q-3/-1997 | 5'primer | GCTGACAGCGGTCACGTTT           | B, D (14) | 1q,2q,4q,5q,6q,8p,<br>10q,13q,16q,19p,19q,<br>21q,22q (Tel); 2qfus<br>(internal) |  |
| 10q-3/-1997 | 3'primer | TAGGGCAGAGAAAAGACATTCA<br>AAA |           |                                                                                  |  |
| GAPDH       | 5'primer | TGGGCTACACTGAGCACCAG          |           |                                                                                  |  |
| GAPDH       | 3'primer | GGGTGTCGCTGTTGAAGTCA          |           |                                                                                  |  |

**Supplementary Table S3. List of probes used for EMSA and Fluorescence****Polarization (FP) Assay.** Point mutations on CTCF binding sites were shown in red.

| Probe               | Sequence (5'-3')                                 |
|---------------------|--------------------------------------------------|
| XYq-5'              | GATCCTGCTGTGCCAGGGCGCCCCCTGCTGGCGACTAGGGCAACTA   |
| XYq-3'              | AGCTTAGTTGCCCTAGTCGCCAGCAGGGGGCGCCCTGGCACAGCAG   |
| 10q-5'              | GATCCAGCCCGTTTTCGGGCGCCCCCTGCTTGCAGCCGGGCACTACA  |
| 10q-3'              | AGCTTGTAGTGCCCGGCTGCAAGCAGGGGGCGCCCGAAACGGGCTG   |
| 7p-5'               | GATCCGGGCGGGATCGCGCGCCCTCTGGTGGCGCCATGGTTCAGCA   |
| 7p-3'               | AGCTTGCTGAACCATGGCGCCACCAGAGGGCGCGCGATCCCGCCCG   |
| $\Delta$ XYq<br>-5' | GATCCTGCTGTGCCAGAAATACAAAATGCTAATAACTAGGGCAACTA  |
| $\Delta$ XYq<br>-3' | AGCTTAGTTGCCCTAGTTATTAGCATTTTGTATTCTGGCACAGCAG   |
| $\Delta$ 10q<br>-5' | GATCCAGCCCGTTTTCGAAATACAAAATGCTTAAACCAGGGCACTACA |
| $\Delta$ 10q<br>-3' | AGCTTGTAGTGCCCGTTTTAAGCATTTTGTATTTCGAAACGGGCTG   |
| $\Delta$ 7p<br>-5'  | GATCCGGGCGGGATCATATATTTTCTAGTAATATCATGGTTCAGCA   |
| $\Delta$ 7p<br>-3'  | AGCTTGCTGAACCATGATATTACTAGAAAATATATGATCCCGCCCG   |

**Fig. S1A**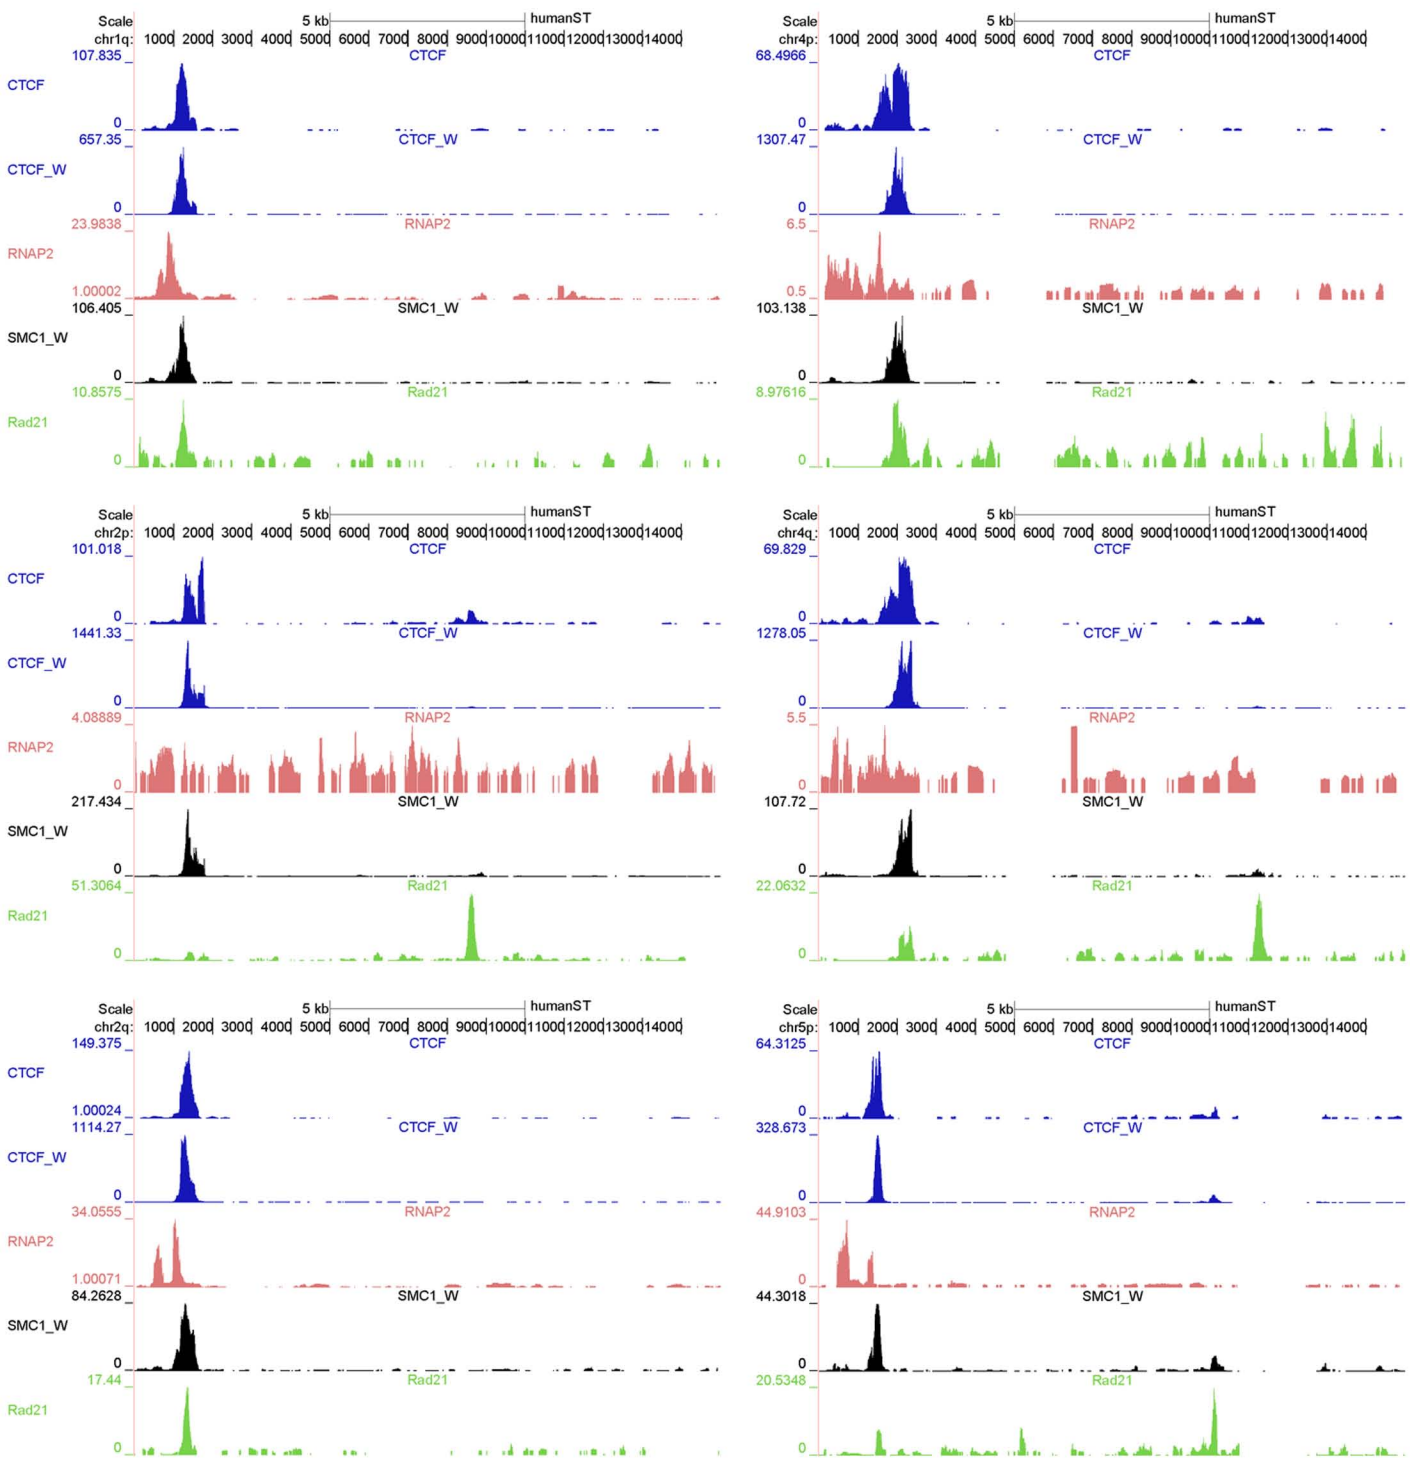

**Fig. S1B**

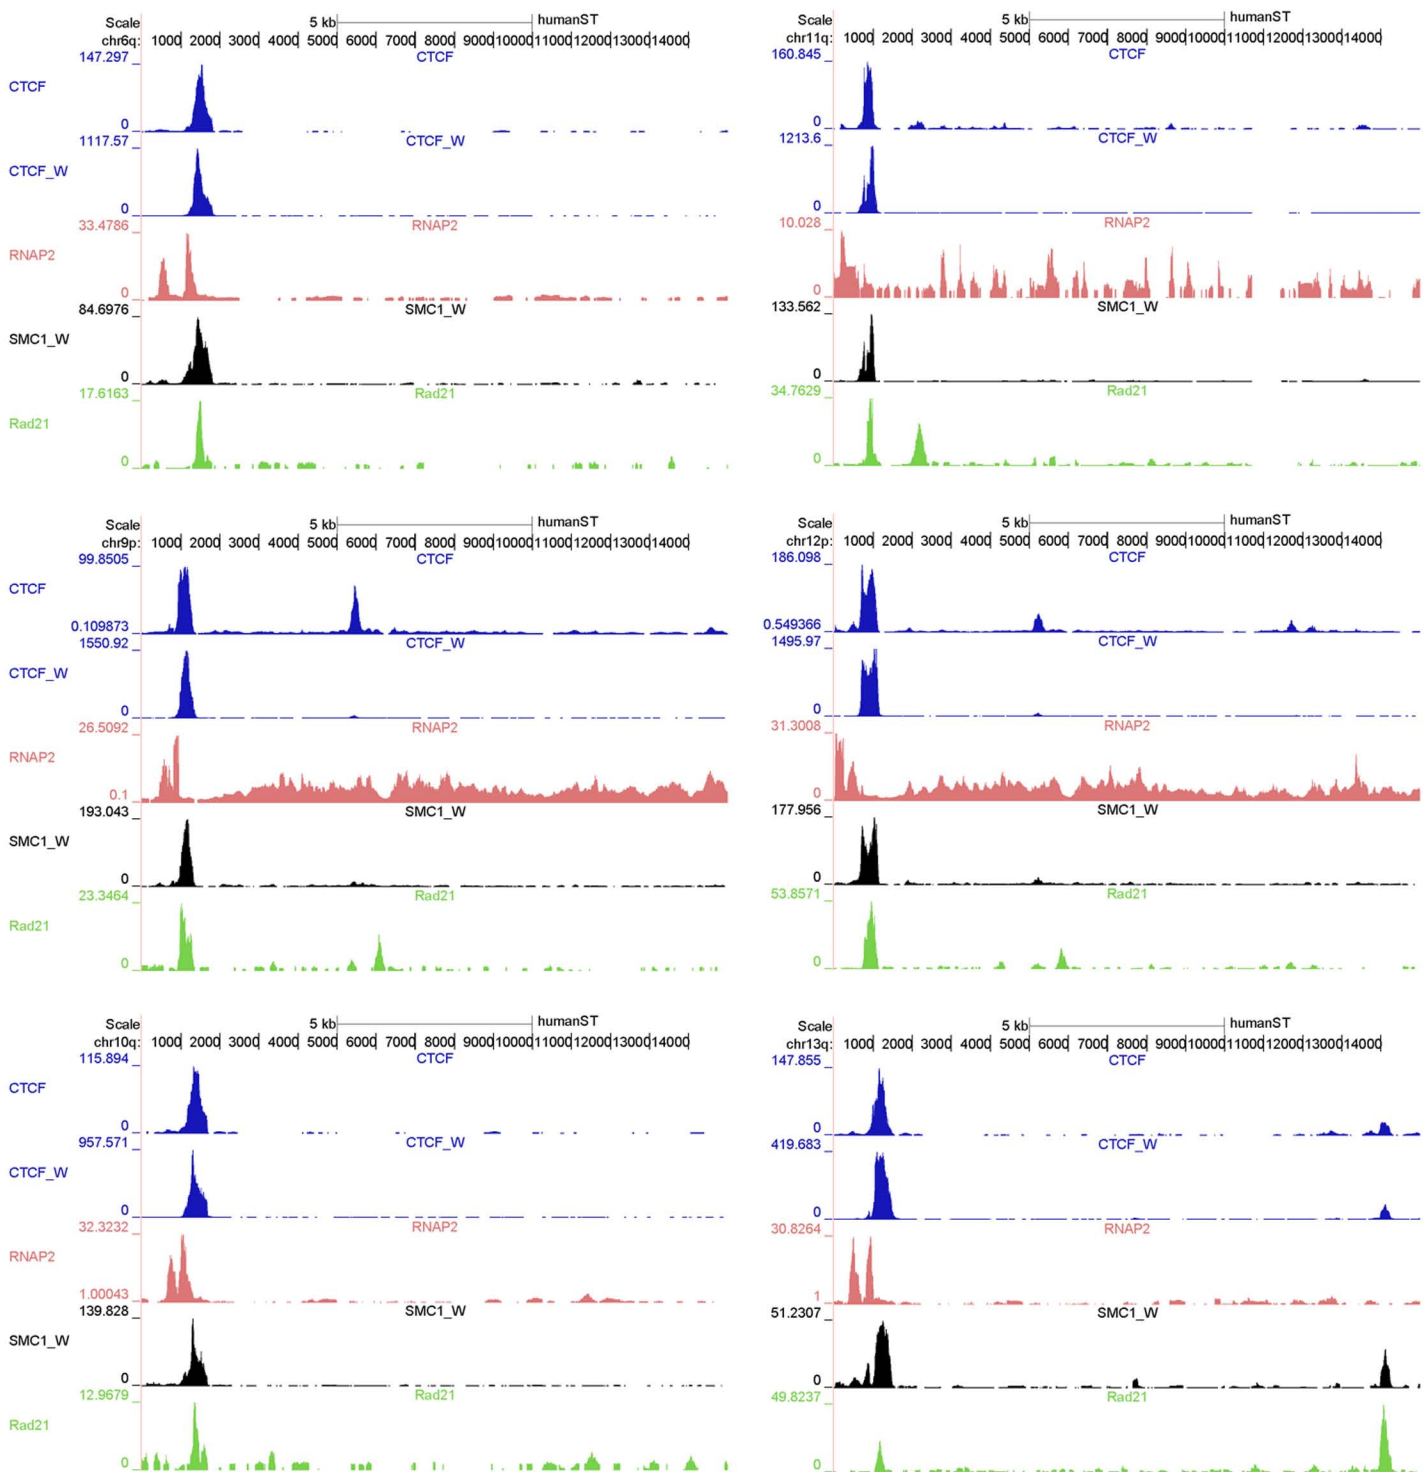



**Fig. S1C**

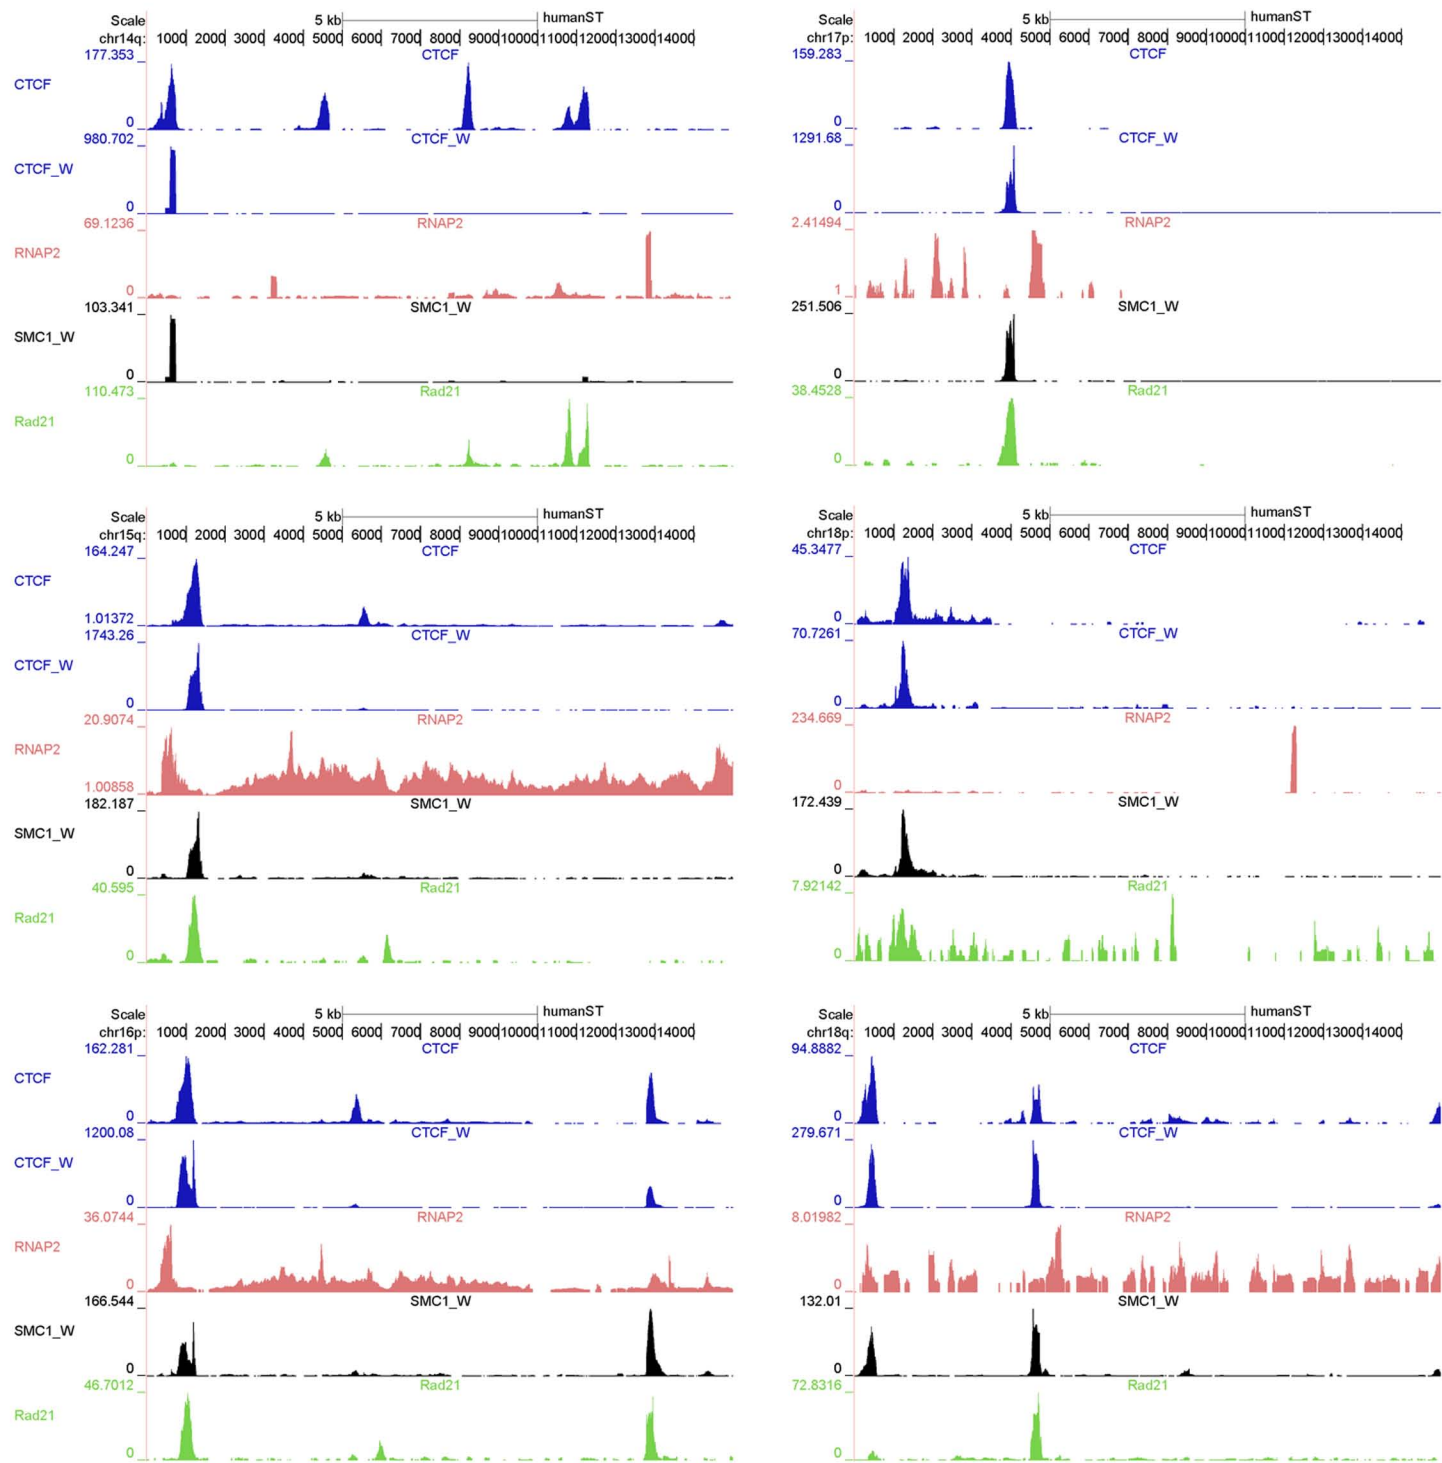

**Fig. S1D**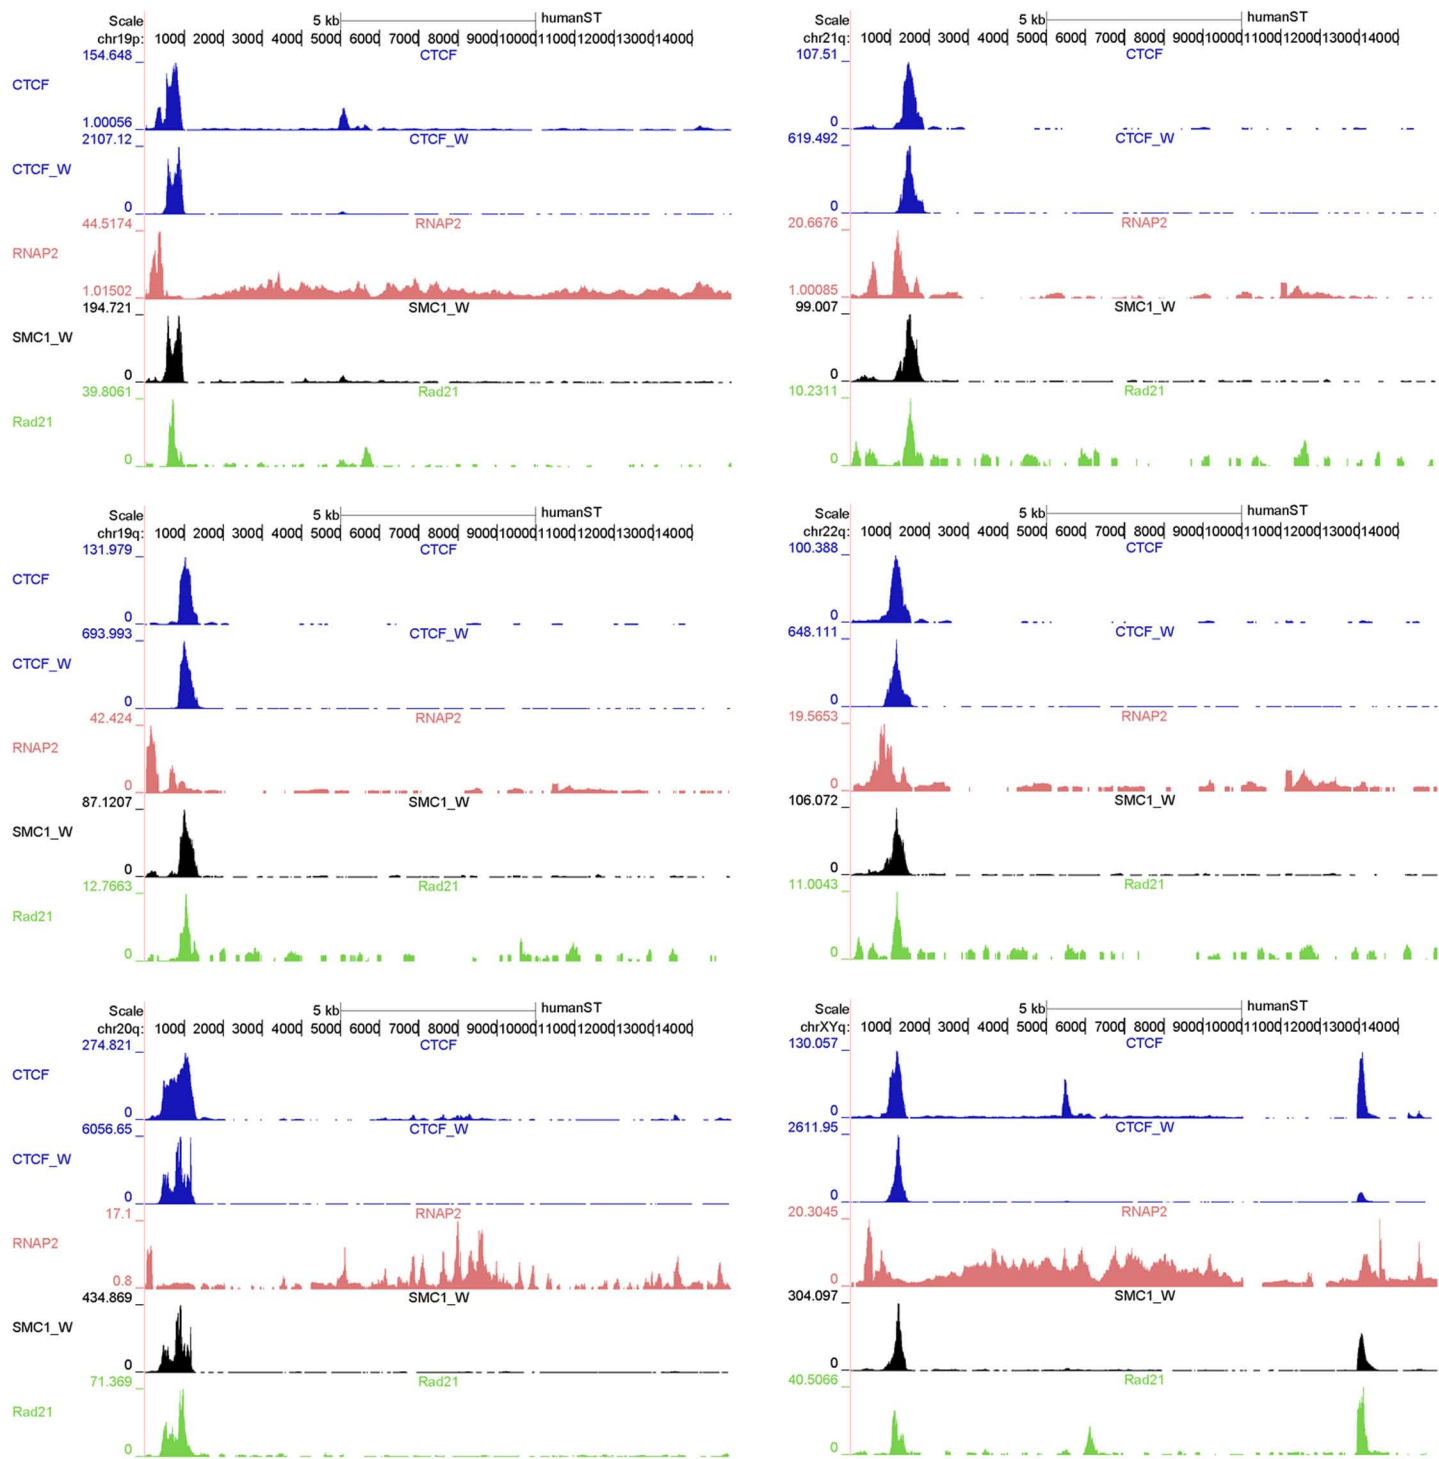

**Fig. S1E**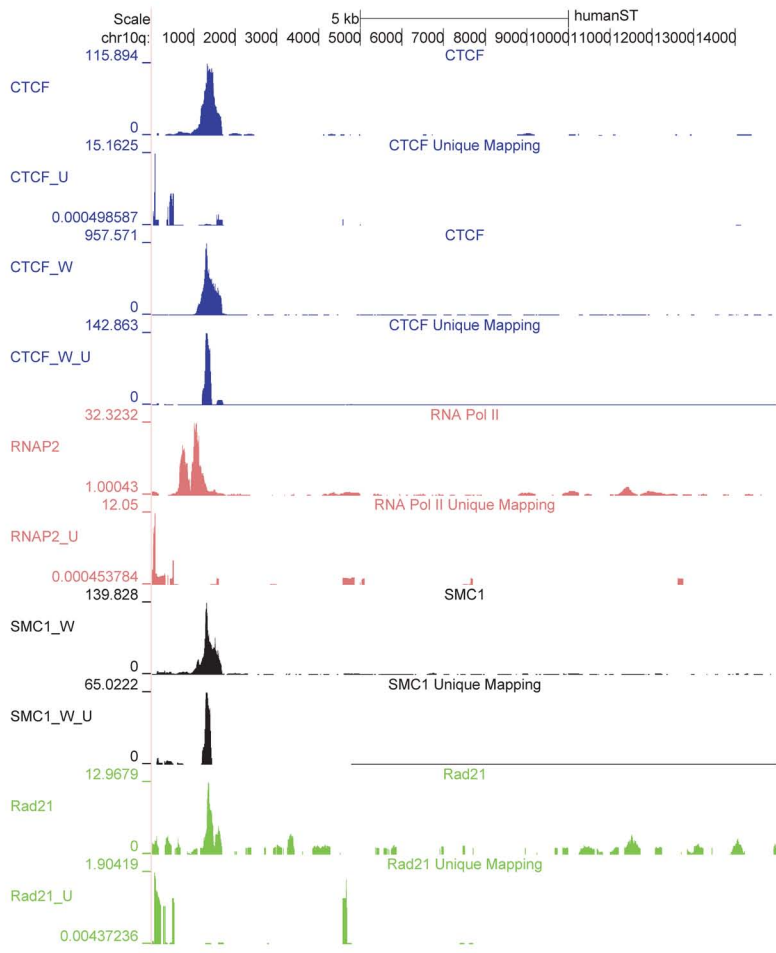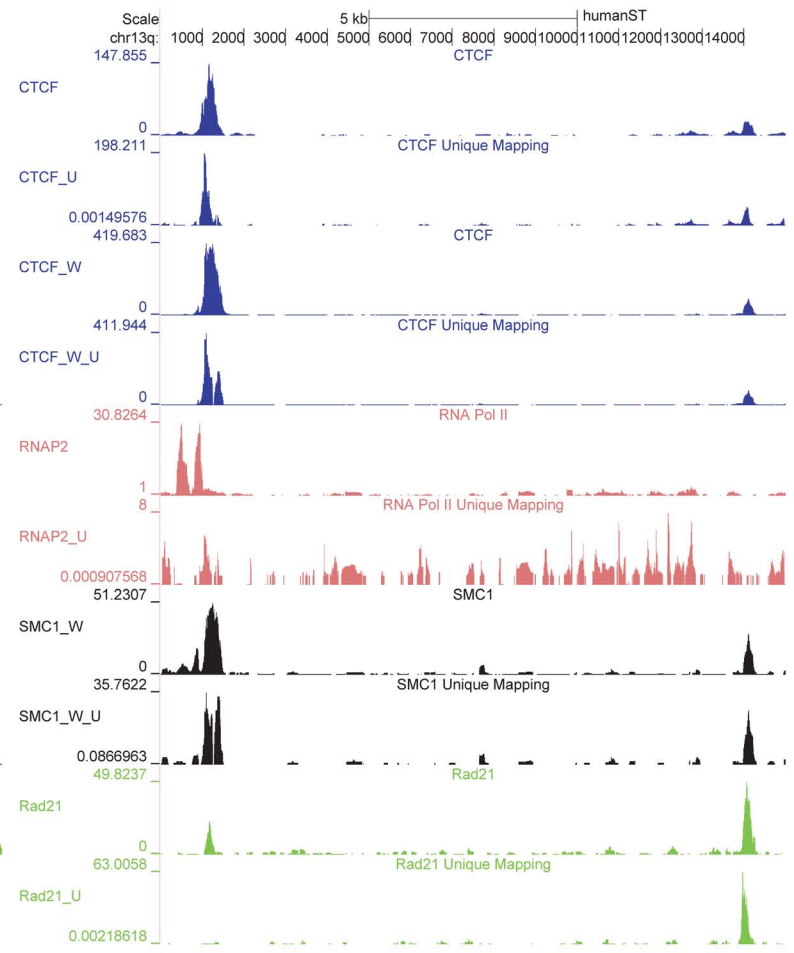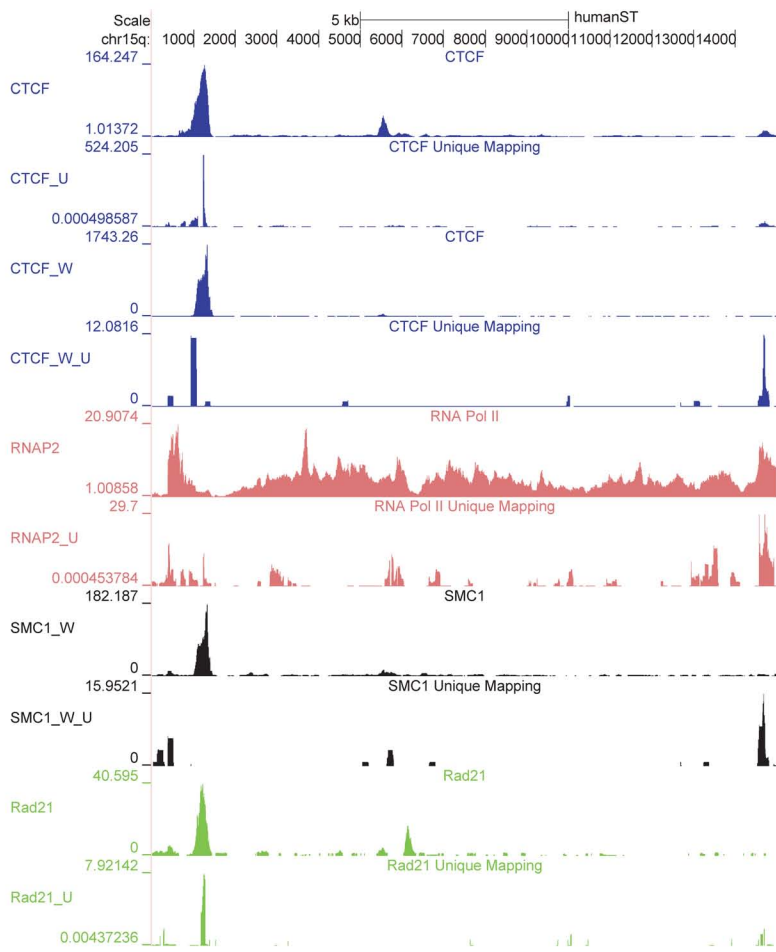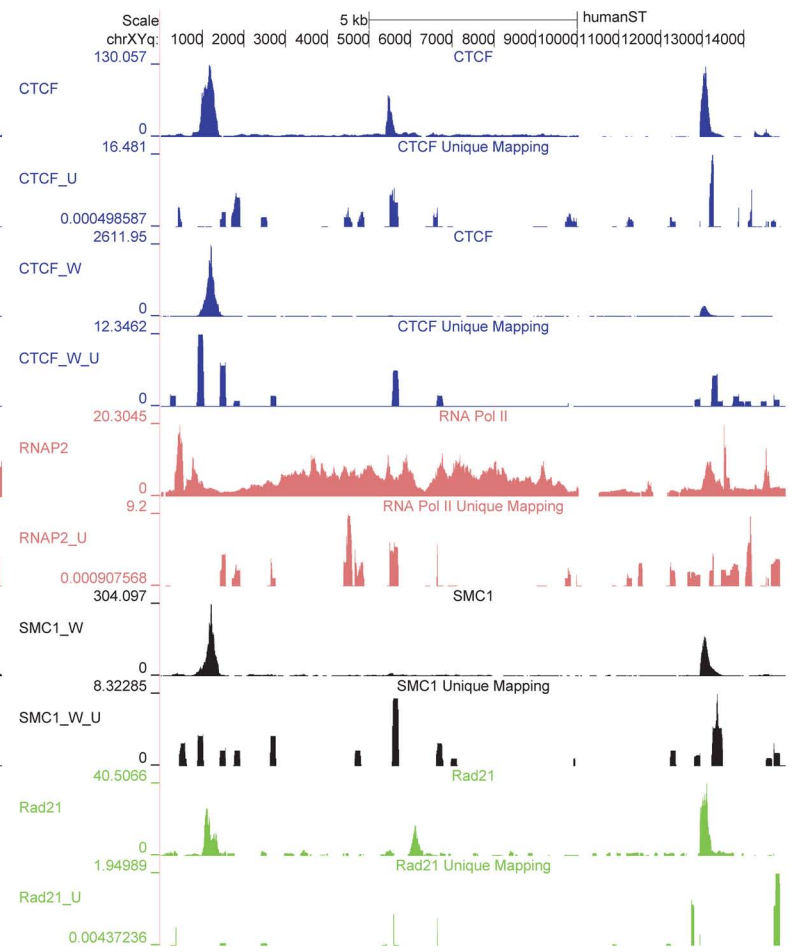

**Fig. S2**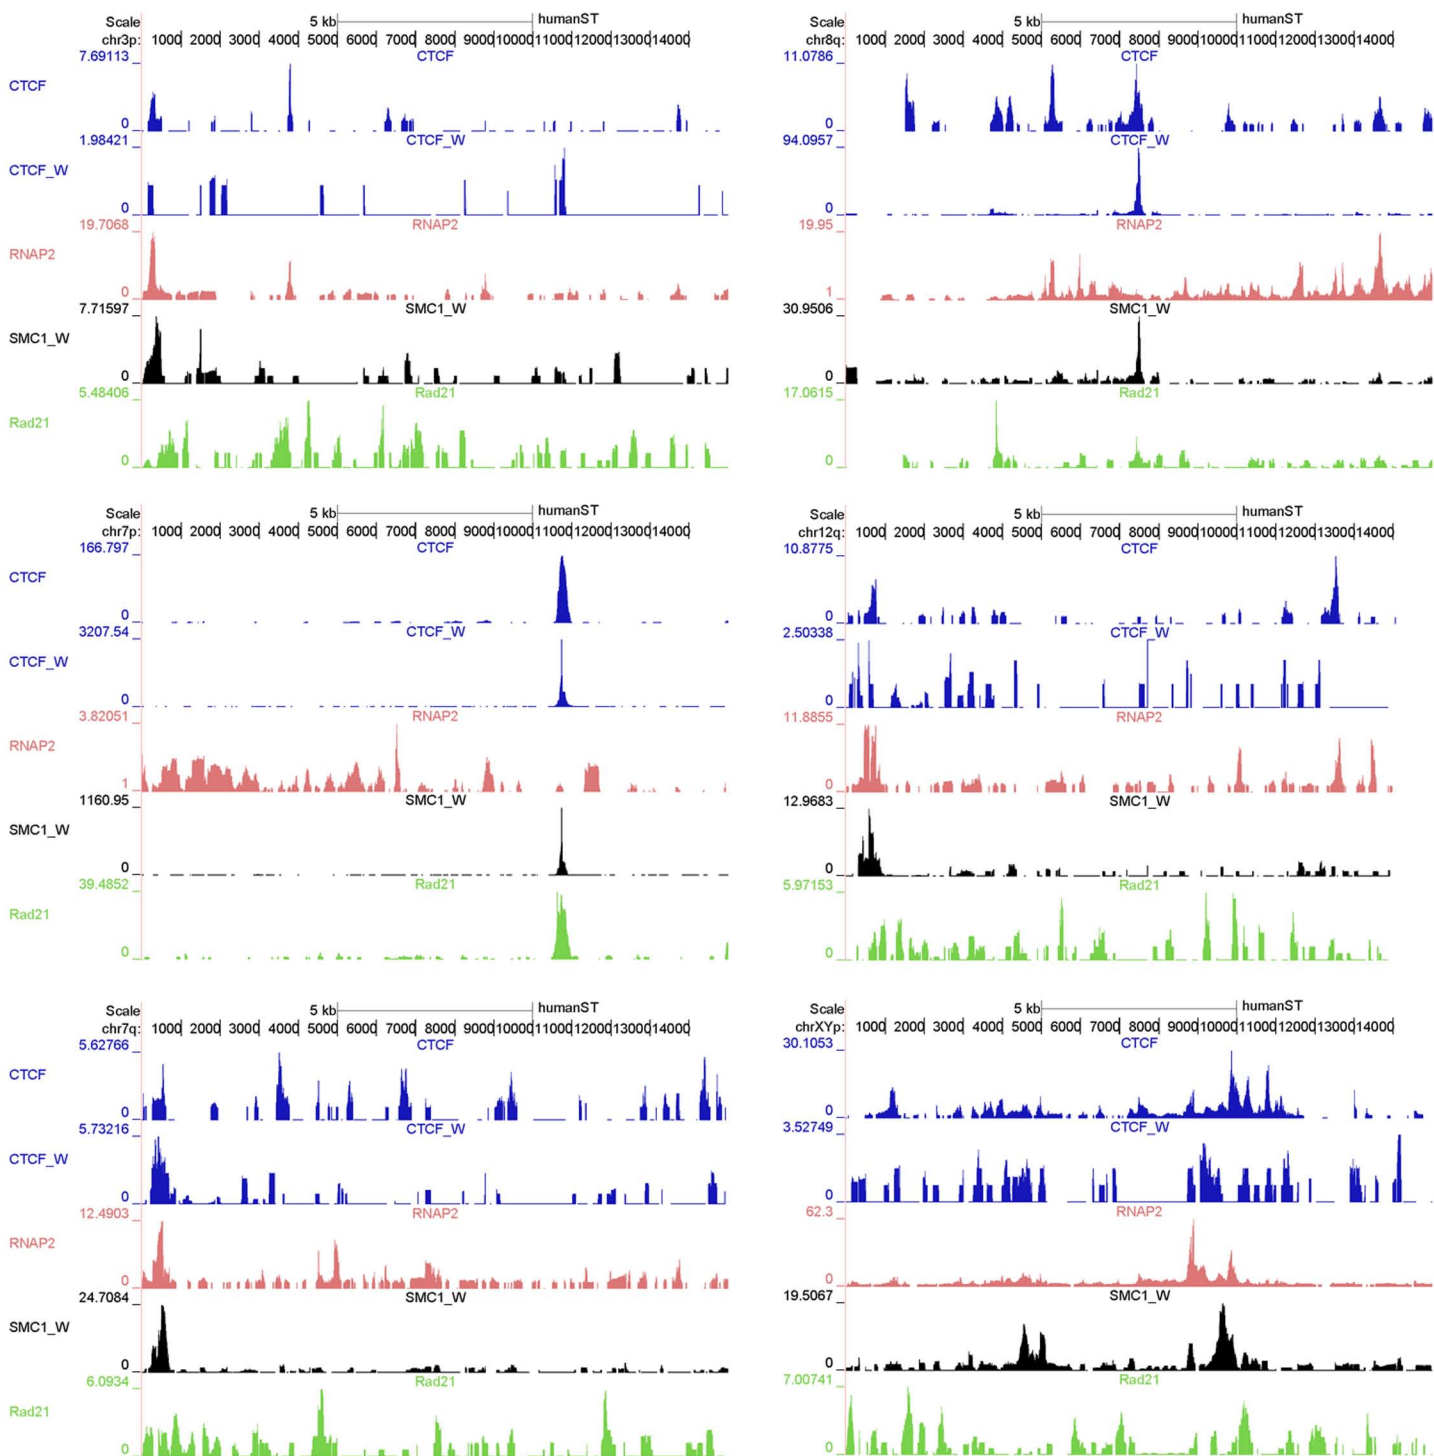

Fig. S3

A

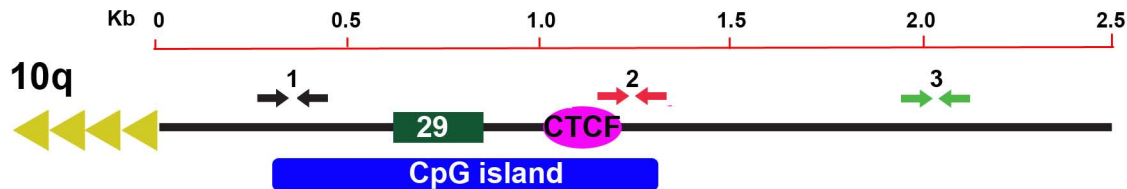

B

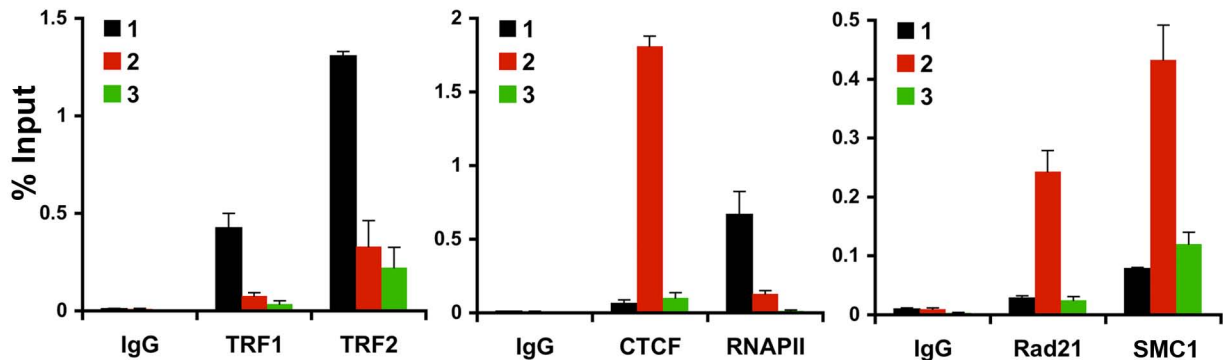

**Fig. S4**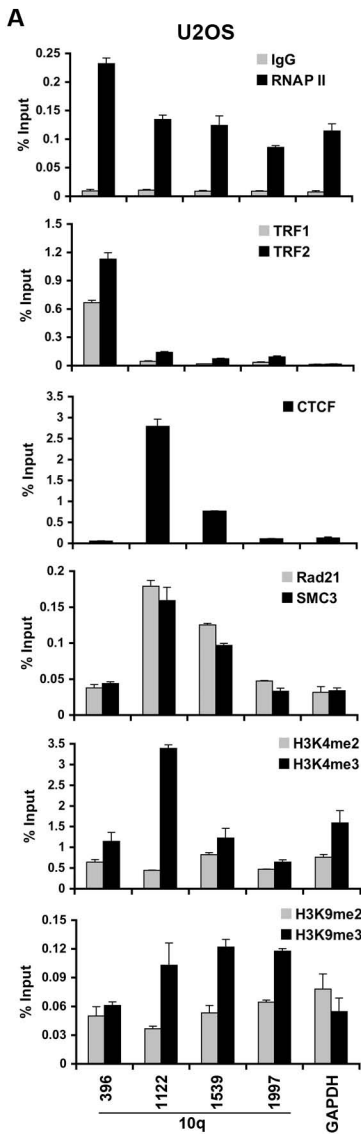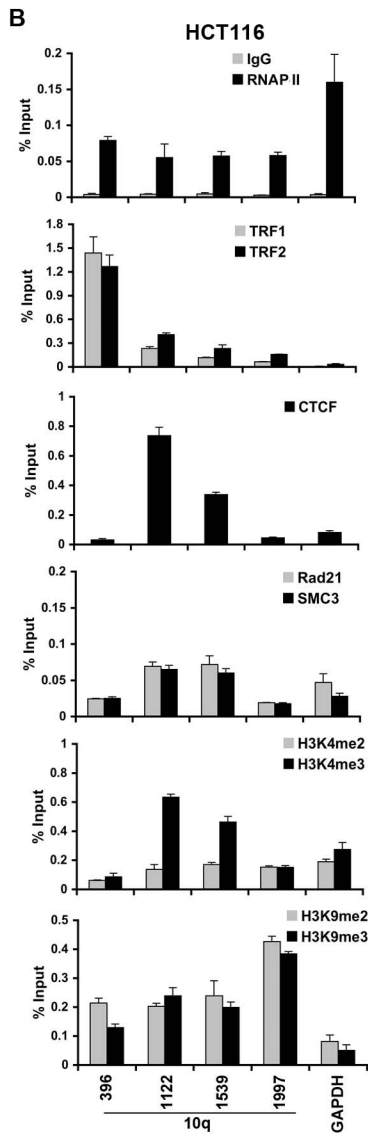

# Fig. S5

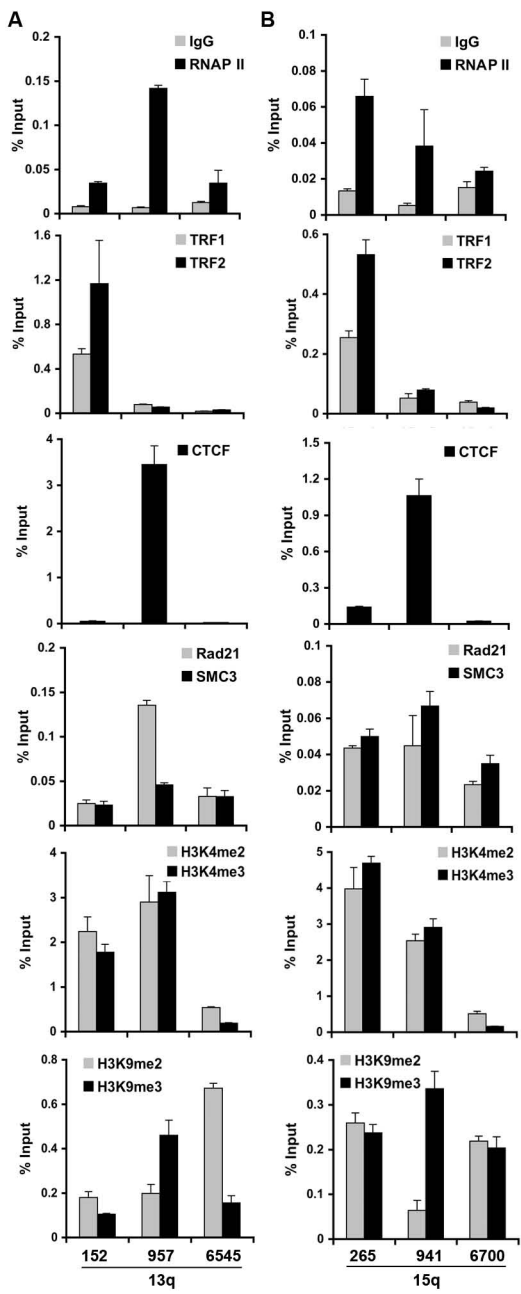

# Fig. S6

**A**

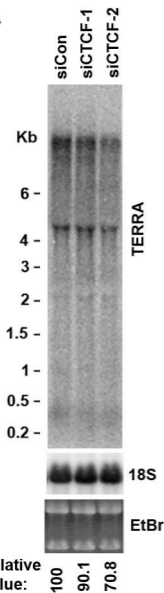

**B**

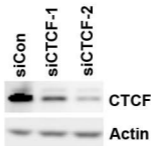

**C**

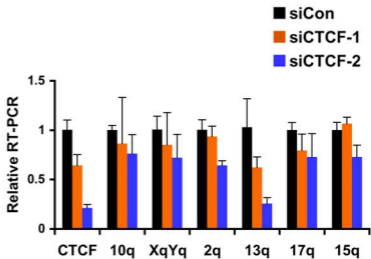



# Fig. S7

## A

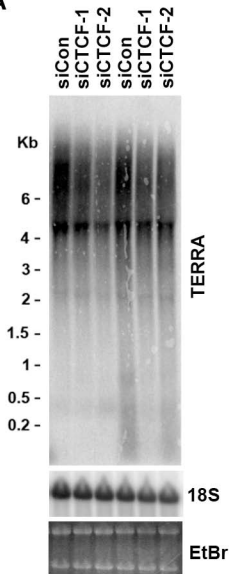

## B

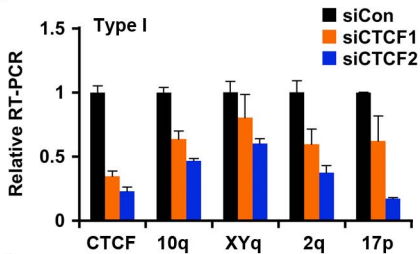

## C

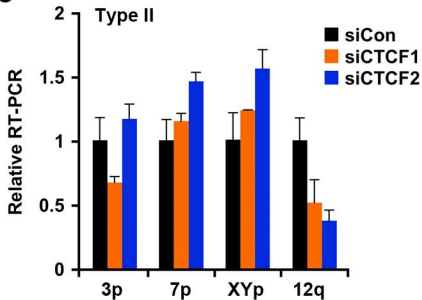

# Fig. S8

## A

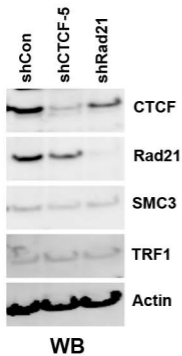

## B

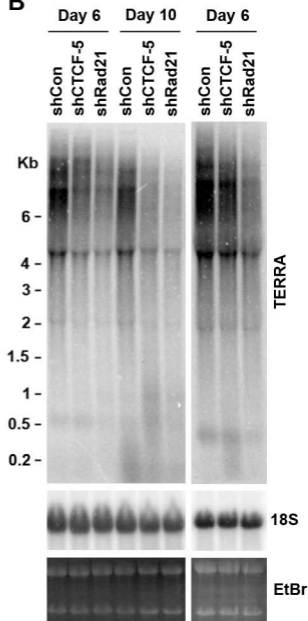

# Fig. S9

**A**

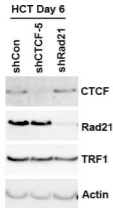

**B**

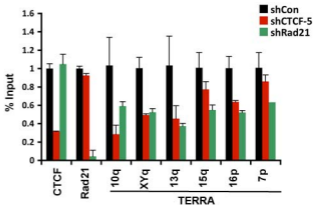

# Fig. S10

## A

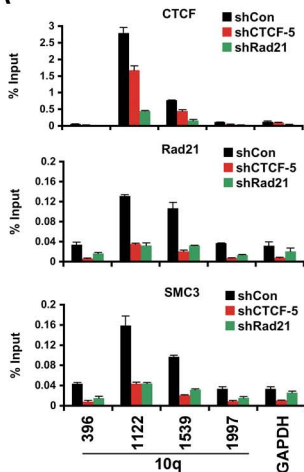

## B

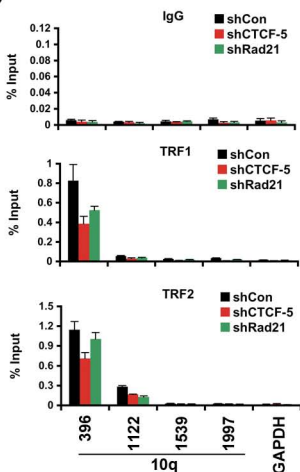

## C

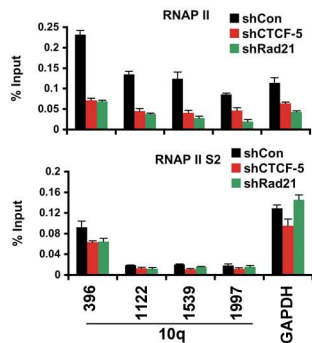

## D

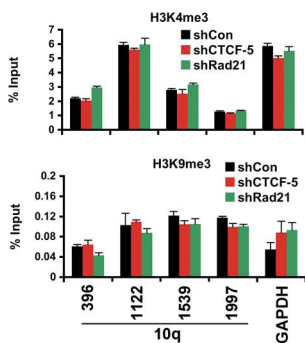

# Fig. S11

**A**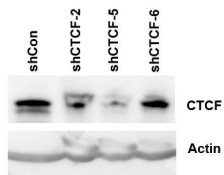**B**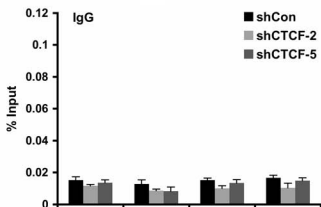**C**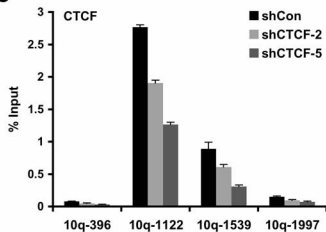**D**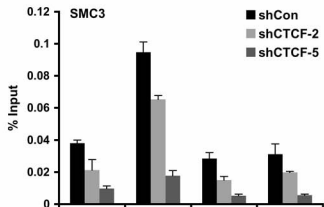**E**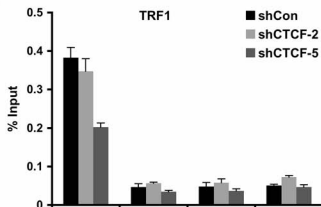**F**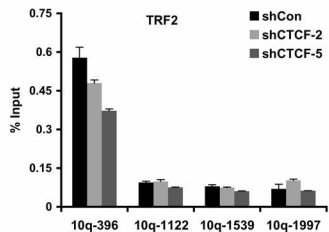

# Fig. S12

**A**

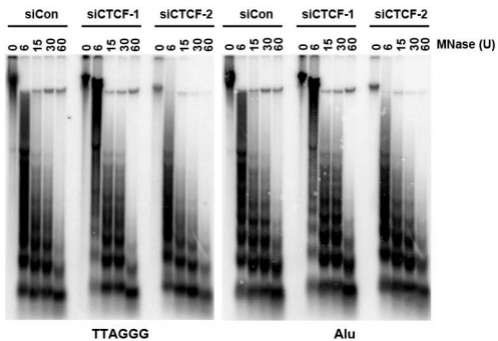

**B**

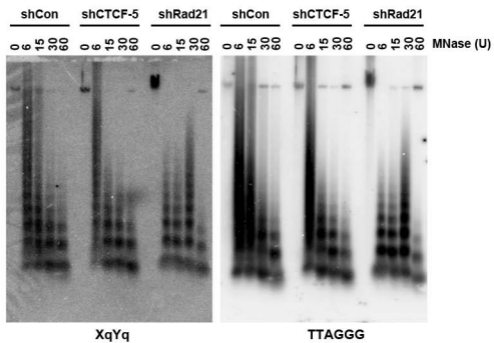

# Fig. S13

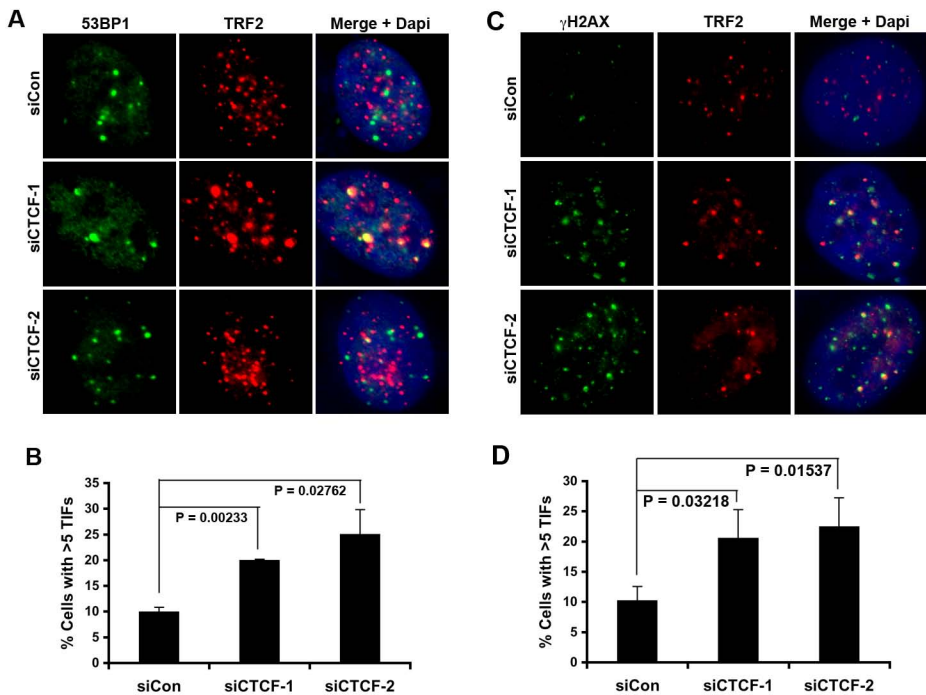

# Fig. S14

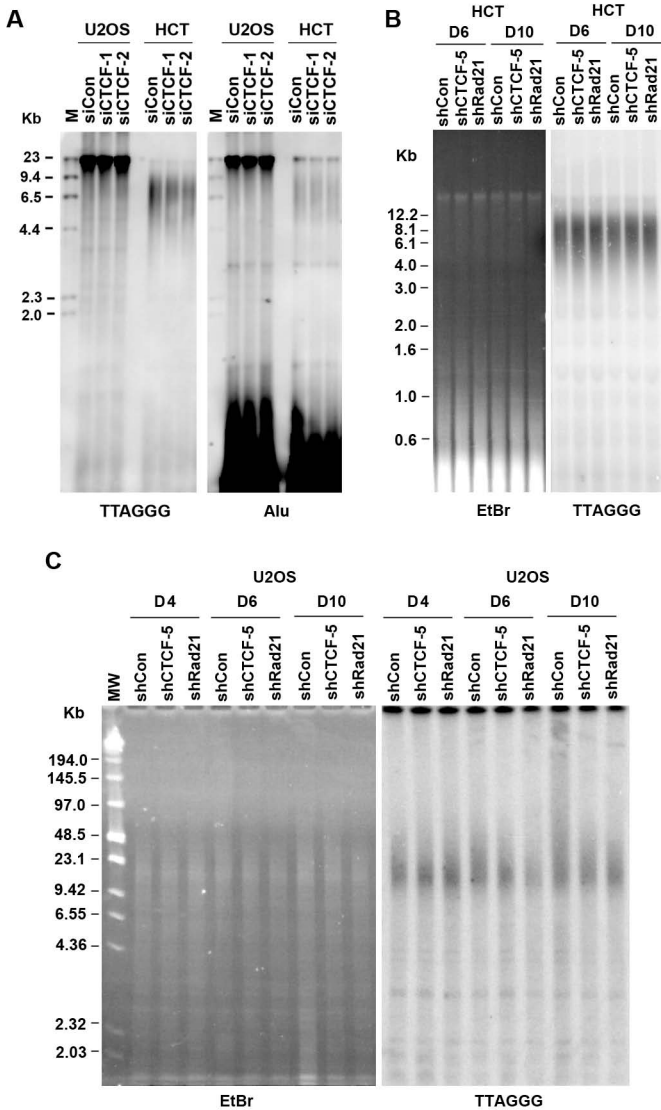



**Fig. S15**

**A**

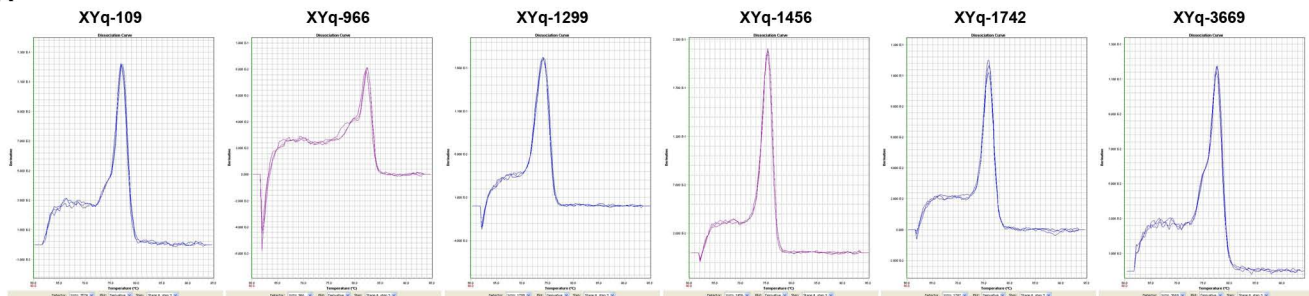

**B**

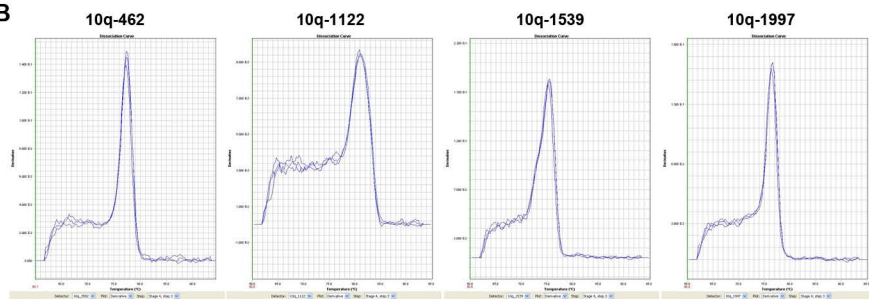

**C**

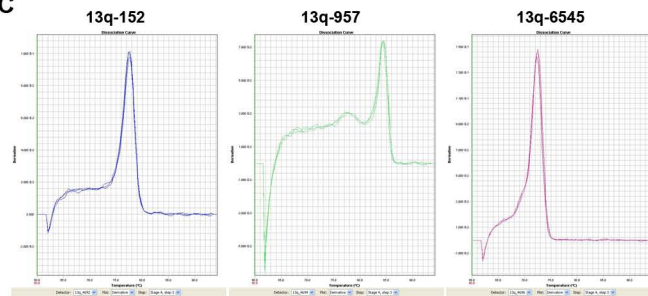

**D**

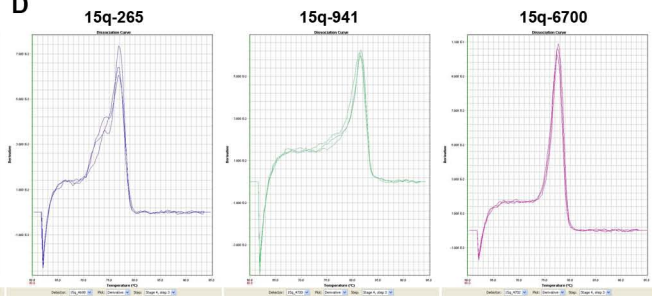

Fig. S16

A

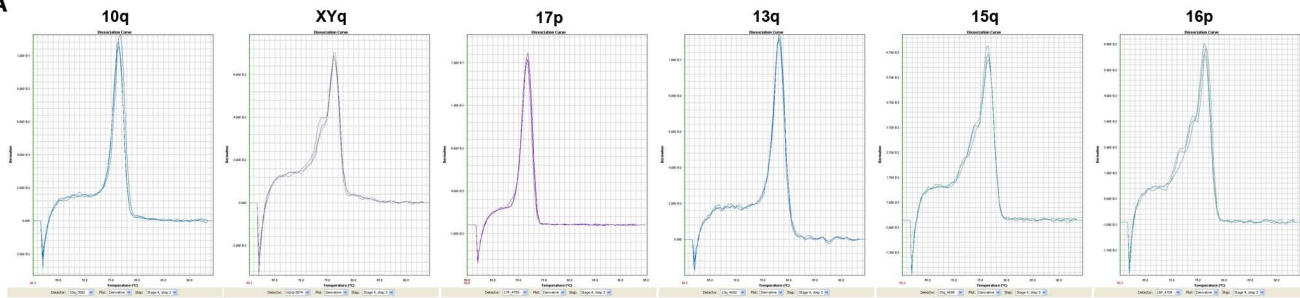

B

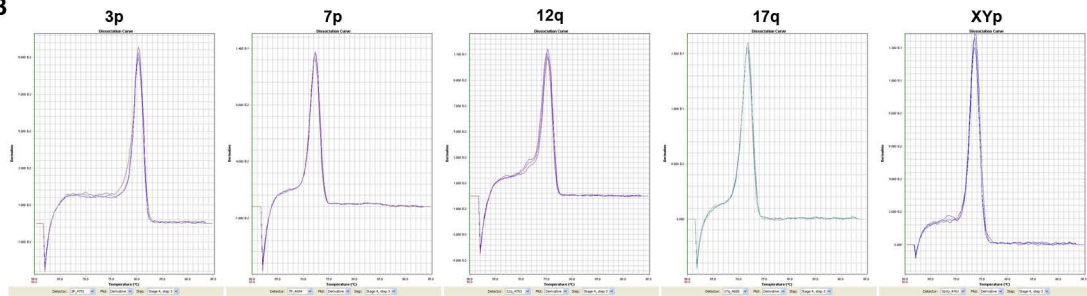

Supplement: emboj2012266s1.pdf [file emboj2012266s1.pdf]
